# Supplementary material for: Prevalence of Drug Prescriptions and Potential Safety in Patients with Cirrhosis: A Retrospective Real-World Study
Source: Springer Nature journal article supplement (doi:10.1007/s40264-018-0744-1), 2018-10-24
Supplement: MOESM1 [file 24118316]

## Prevalence of Drug Prescriptions and Potential Safety in Patients with Cirrhosis: A Retrospective Real-World Study

Journal: Drug Safety

Authors: Rianne A. Weersink, Katja Taxis, Joost P.H. Drenth, Eline Houben, Herold J. Metselaar, Sander D. Borgsteede

Correspondence to: Rianne A. Weersink. Affiliations: Health Base Foundation and the University of Groningen. Email: r.a.weersink@rug.nl

**Supplementary Fig. 1** Period prevalence in calendar years of use of the 10 most frequently used drug groups (ATC 4<sup>th</sup> level) from 1998 to 2015

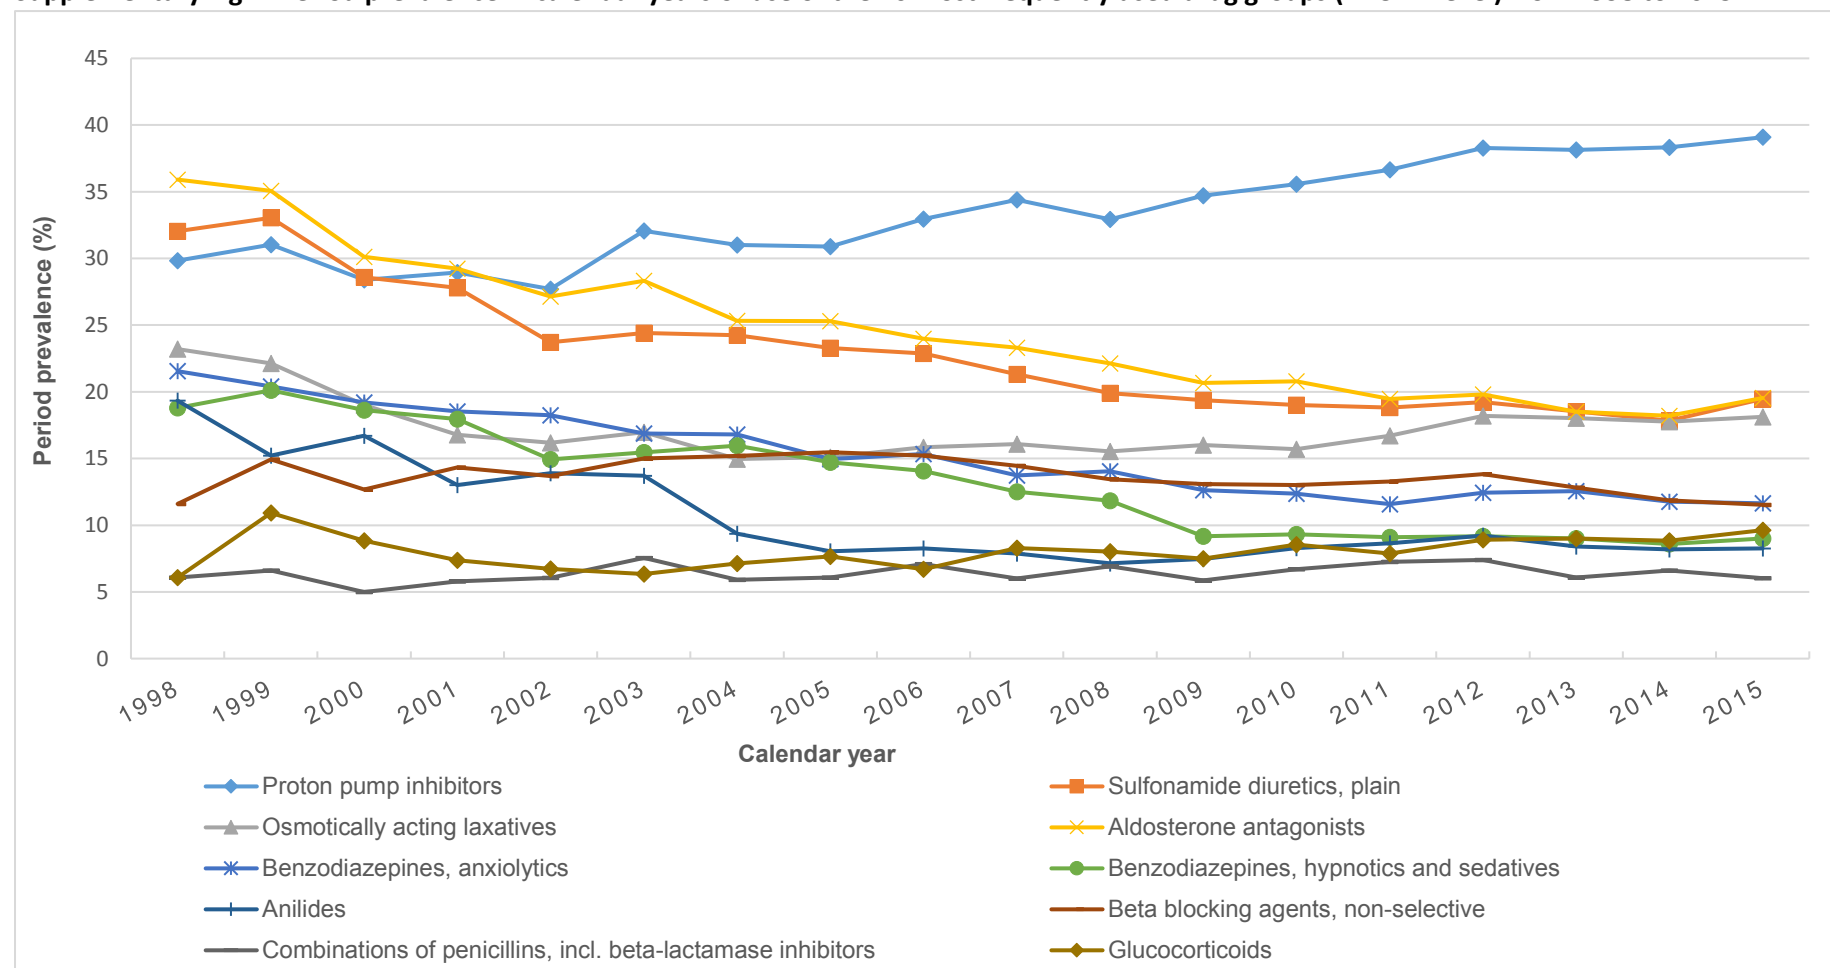

Drug groups are defined as ATC subgroups (4<sup>th</sup> level). Per calendar year, the number of users per ATC subgroup was divided by the total number of patients included in the cohort that year. ATC Anatomical Therapeutic Chemical
